# Supplementary material for: Cannabis Seedlings Inherit Seed-Borne Bioactive and Anti-Fungal Endophytic Bacilli
Source: MDPI journal article supplement (doi:10.3390/plants11162127), 2022-08-15
Supplement: s1 [file s1]

**Table S1.** Isolate Metadata.

| Sample ID | Taxonomy                             | Kingdom  | Host      | Genotype    | Tissue   | Media | Protocol   | Surface sterilization |
|-----------|--------------------------------------|----------|-----------|-------------|----------|-------|------------|-----------------------|
| OKM58     | <i>Paenibacillus mobilis</i>         | Bacteria | Hemp      | Canda       | Seedling | TSA   | Maceration | Bleach+EtOH           |
| OKM59     | <i>Pantoea agglomerans</i>           | Bacteria | Hemp      | Canda       | Seedling | TSA   | Maceration | Bleach+EtOH           |
| OKM60     | <i>Paenibacillus mobilis</i>         | Bacteria | Hemp      | Canda       | Seedling | TSA   | Maceration | Bleach+EtOH           |
| OKM62     | <i>Paenibacillus mobilis</i>         | Bacteria | Hemp      | Canda       | Seedling | TSA   | Maceration | Bleach+EtOH           |
| OKM63     | <i>Paenibacillus mobilis</i>         | Bacteria | Hemp      | Canda       | Seedling | TSA   | Maceration | Bleach+EtOH           |
| OKM64     | <i>Paenibacillus mobilis</i>         | Bacteria | Hemp      | Canda       | Seedling | R2A   | Maceration | Bleach+EtOH           |
| OKM65     | <i>Paenibacillus mobilis</i>         | Bacteria | Hemp      | Canda       | Seedling | R2A   | Maceration | Bleach+EtOH           |
| OKM67     | <i>Paenibacillus mobilis</i>         | Bacteria | Hemp      | Canda       | Seedling | R2A   | Maceration | Bleach+EtOH           |
| OKM68     | <i>Paenibacillus mobilis</i>         | Bacteria | Hemp      | Canda       | Seedling | R2A   | Maceration | Bleach+EtOH           |
| OKM69     | <i>Paenibacillus mobilis</i>         | Bacteria | Hemp      | Canda       | Seedling | R2A   | Maceration | Bleach+EtOH           |
| OKM76     | <i>Paenibacillus mobilis</i>         | Bacteria | Marijuana | White Widow | Seedling | R2A   | Maceration | Bleach+EtOH           |
| OKM77     | <i>Paenibacillus illinoisensis</i>   | Bacteria | Marijuana | White Widow | Seedling | R2A   | Maceration | Bleach+EtOH           |
| OKM78     | <i>Bacillus megaterium</i>           | Bacteria | Marijuana | White Widow | Seedling | R2A   | Maceration | Bleach+EtOH           |
| OKM79     | <i>Paenibacillus illinoisensis</i>   | Bacteria | Marijuana | White Widow | Seedling | R2A   | Maceration | Bleach+EtOH           |
| OKM80     | <i>Paenibacillus illinoisensis</i>   | Bacteria | Marijuana | White Widow | Seedling | R2A   | Maceration | Bleach+EtOH           |
| OKM81     | <i>Paenibacillus illinoisensis</i>   | Bacteria | Marijuana | White Widow | Seedling | R2A   | Maceration | Bleach+EtOH           |
| OKM82     | <i>Paenibacillus illinoisensis</i>   | Bacteria | Marijuana | White Widow | Seedling | R2A   | Maceration | Bleach+EtOH           |
| OKM83     | <i>Paenibacillus illinoisensis</i>   | Bacteria | Marijuana | Afghani     | Seedling | TSA   | Maceration | Bleach+EtOH           |
| OKM84     | <i>Paenibacillus taohuashanense</i>  | Bacteria | Marijuana | Afghani     | Seedling | TSA   | Maceration | Bleach+EtOH           |
| OKM85     | <i>Paenibacillus pabuli</i>          | Bacteria | Marijuana | Afghani     | Seedling | TSA   | Maceration | Bleach+EtOH           |
| OKM86     | <i>Paenibacillus pabuli</i>          | Bacteria | Marijuana | Afghani     | Seedling | TSA   | Maceration | Bleach+EtOH           |
| OKM87     | <i>Paenibacillus mobilis</i>         | Bacteria | Marijuana | Afghani     | Seedling | TSA   | Maceration | Bleach+EtOH           |
| OKM88     | <i>Paenibacillus pabuli</i>          | Bacteria | Marijuana | White Widow | Seedling | TSA   | Maceration | Bleach+EtOH           |
| OKM89     | <i>Paenibacillus mobilis</i>         | Bacteria | Marijuana | White Widow | Seedling | TSA   | Maceration | Bleach+EtOH           |
| OKM90     | <i>Paenibacillus pabuli</i>          | Bacteria | Marijuana | God's Pink  | Seedling | R2A   | Maceration | Bleach+EtOH           |
| OKM92     | <i>Paenibacillus mobilis</i>         | Bacteria | Marijuana | God's Pink  | Seedling | R2A   | Maceration | Bleach+EtOH           |
| OKM93     | <i>Paenibacillus mobilis</i>         | Bacteria | Marijuana | God's Pink  | Seedling | TSA   | Maceration | Bleach+EtOH           |
| OKM94     | <i>Bacillus megaterium</i>           | Bacteria | Marijuana | God's Pink  | Seedling | R2A   | Maceration | Bleach+EtOH           |
| OKM95     | <i>Bacillus/Peribacillus simplex</i> | Bacteria | Marijuana | BC Big Bud  | Seedling | R2A   | Maceration | Bleach+EtOH           |
| OKM96     | <i>Bacillus inaquosorum</i>          | Bacteria | Marijuana | BC Big Bud  | Seedling | TSA   | Maceration | Bleach+EtOH           |
| OKM97     | <i>Bacillus aerius</i>               | Bacteria | Marijuana | BC Big Bud  | Seedling | TSA   | Maceration | Bleach+EtOH           |
| OKM98     | <i>Bacillus stratosphericus</i>      | Bacteria | Marijuana | BC Big Bud  | Seedling | TSA   | Maceration | Bleach+EtOH           |
| OKM99     | <i>Paenibacillus mobilis</i>         | Bacteria | Marijuana | BC Big Bud  | Seedling | TSA   | Maceration | Bleach+EtOH           |
| OKM100    | <i>Bacillus aerius</i>               | Bacteria | Marijuana | BC Big Bud  | Seedling | TSA   | Maceration | Bleach+EtOH           |
| OKM101    | <i>Paenibacillus mobilis</i>         | Bacteria | Marijuana | BC Big Bud  | Seedling | TSA   | Maceration | Bleach+EtOH           |
| OKM102    | <i>Paenibacillus pabuli</i>          | Bacteria | Marijuana | BC Big Bud  | Seedling | TSA   | Maceration | Bleach+EtOH           |
| OKM103    | <i>Paenibacillus mobilis</i>         | Bacteria | Hemp      | X-59        | Seedling | TSA   | Maceration | Bleach+EtOH           |
| OKM104    | <i>Bacillus circulans</i>            | Bacteria | Hemp      | X-59        | Seedling | TSA   | Maceration | Bleach+EtOH           |
| OKM105    | <i>Paenibacillus vulneris</i>        | Bacteria | Hemp      | X-59        | Seedling | TSA   | Maceration | Bleach+EtOH           |
| OKM106    | <i>Bacillus megaterium</i>           | Bacteria | Hemp      | X-59        | Seedling | R2A   | Maceration | Bleach+EtOH           |
| OKM107    | <i>Paenibacillus mobilis</i>         | Bacteria | Hemp      | X-59        | Seedling | R2A   | Maceration | Bleach+EtOH           |
| OKM108    | <i>Brevibacillus choshinensis</i>    | Bacteria | Marijuana | BC Big Bud  | Seedling | R2A   | Maceration | Bleach+EtOH           |
| OKM109    | <i>Paenibacillus taohuashanense</i>  | Bacteria | Marijuana | BC Big Bud  | Seedling | R2A   | Maceration | Bleach+EtOH           |
| OKM110    | <i>Paenibacillus mobilis</i>         | Bacteria | Marijuana | BC Big Bud  | Seedling | R2A   | Maceration | Bleach+EtOH           |
| OKM111    | <i>Paenibacillus pabuli</i>          | Bacteria | Marijuana | BC Big Bud  | Seedling | R2A   | Maceration | Bleach+EtOH           |
| OKM112    | <i>Bacillus megaterium</i>           | Bacteria | Hemp      | X-59        | Seedling | TSA   | Maceration | Bleach+EtOH           |
| OKM113    | <i>Bacillus megaterium</i>           | Bacteria | Hemp      | X-59        | Seedling | TSA   | Maceration | Bleach+EtOH           |
| OKM114    | <i>Paenibacillus mobilis</i>         | Bacteria | Hemp      | X-59        | Seedling | R2A   | Maceration | Bleach+EtOH           |
| OKM115    | <i>Bacillus subtilis</i>             | Bacteria | Marijuana | BC Big Bud  | Seedling | R2A   | Maceration | Bleach+EtOH           |
| OKM116    | <i>Paenibacillus mobilis</i>         | Bacteria | Marijuana | BC Big Bud  | Seedling | R2A   | Maceration | Bleach+EtOH           |
| OKM117    | <i>Brevibacillus choshinensis</i>    | Bacteria | Marijuana | BC Big Bud  | Seedling | R2A   | Maceration | Bleach+EtOH           |
| OKM118    | <i>Paenibacillus mobilis</i>         | Bacteria | Marijuana | God's Bud   | Seedling | R2A   | Maceration | Bleach+EtOH           |
| OKM119    | <i>Bacillus/Peribacillus simplex</i> | Bacteria | Marijuana | God's Bud   | Seedling | R2A   | Maceration | Bleach+EtOH           |

|        |                                      |          |           |            |          |     |            |             |
|--------|--------------------------------------|----------|-----------|------------|----------|-----|------------|-------------|
| OKM120 | <i>Paenibacillus mobilis</i>         | Bacteria | Marijuana | God's Bud  | Seedling | R2A | Maceration | Bleach+EtOH |
| OKM121 | <i>Bacillus subtilis</i>             | Bacteria | Marijuana | God's Bud  | Seedling | TSA | Maceration | Bleach+EtOH |
| OKM122 | <i>Paenibacillus mobilis</i>         | Bacteria | Marijuana | God's Bud  | Seedling | TSA | Maceration | Bleach+EtOH |
| OKM123 | <i>Brevibacillus choshinensis</i>    | Bacteria | Marijuana | God's Bud  | Seedling | TSA | Maceration | Bleach+EtOH |
| OKM124 | <i>Paenibacillus mobilis</i>         | Bacteria | Marijuana | BC Big Bud | Seedling | R2A | Maceration | Bleach+EtOH |
| OKM125 | <i>Bacillus/Peribacillus simplex</i> | Bacteria | Marijuana | BC Big Bud | Seedling | R2A | Maceration | Bleach+EtOH |
| OKM126 | <i>Paenibacillus mobilis</i>         | Bacteria | Marijuana | God's Bud  | Seedling | TSA | Maceration | Bleach+EtOH |
| OKM127 | <i>Paenibacillus mobilis</i>         | Bacteria | Hemp      | CAN 3797   | Seedling | R2A | Maceration | Bleach+EtOH |
| OKM128 | <i>Bacillus subtilis</i>             | Bacteria | Hemp      | CAN 3797   | Seedling | R2A | Maceration | Bleach+EtOH |
| OKM129 | <i>Paenibacillus mobilis</i>         | Bacteria | Hemp      | CAN 3797   | Seedling | R2A | Maceration | Bleach+EtOH |
| OKM130 | <i>Paenibacillus taohuashanense</i>  | Bacteria | Hemp      | CAN 3797   | Seedling | R2A | Maceration | Bleach+EtOH |
| OKM131 | <i>Bacillus subtilis</i>             | Bacteria | Hemp      | CAN 3797   | Seedling | R2A | Maceration | Bleach+EtOH |
| OKM132 | <i>Bacillus megaterium</i>           | Bacteria | Hemp      | CAN 3797   | Seedling | R2A | Maceration | Bleach+EtOH |
| OKM133 | <i>Bacillus megaterium</i>           | Bacteria | Hemp      | CAN 3797   | Seedling | TSA | Maceration | Bleach+EtOH |
| OKM134 | <i>Paenibacillus vulneris</i>        | Bacteria | Hemp      | CAN 3797   | Seedling | TSA | Maceration | Bleach+EtOH |
| OKM135 | <i>Paenibacillus mobilis</i>         | Bacteria | Hemp      | CAN 3797   | Seedling | TSA | Maceration | Bleach+EtOH |
| OKM136 | <i>Paenibacillus pabuli</i>          | Bacteria | Hemp      | CAN 3797   | Seedling | TSA | Maceration | Bleach+EtOH |
| OKM137 | <i>Paenibacillus mobilis</i>         | Bacteria | Hemp      | CAN 3797   | Seedling | TSA | Maceration | Bleach+EtOH |
| OKM138 | <i>Paenibacillus mobilis</i>         | Bacteria | Hemp      | CAN 3797   | Seedling | TSA | Maceration | Bleach+EtOH |
| OKM139 | <i>Paenibacillus mobilis</i>         | Bacteria | Hemp      | CAN 3797   | Seedling | TSA | Maceration | Bleach+EtOH |
| OKM140 | <i>Paenibacillus mobilis</i>         | Bacteria | Hemp      | CAN 3797   | Seedling | TSA | Maceration | Bleach+EtOH |
| OKM141 | <i>Bacillus velezensis</i>           | Bacteria | Hemp      | CAN 3797   | Seedling | TSA | Maceration | Bleach+EtOH |
| OKM142 | <i>Paenibacillus taohuashanense</i>  | Bacteria | Hemp      | CAN 3797   | Seedling | TSA | Maceration | Bleach+EtOH |
| OKM143 | <i>Bacillus subtilis</i>             | Bacteria | Hemp      | CAN 3797   | Seedling | TSA | Maceration | Bleach+EtOH |
| OKM144 | <i>Paenibacillus mobilis</i>         | Bacteria | Hemp      | CAN 3797   | Seedling | TSA | Maceration | Bleach+EtOH |
| OKM145 | <i>Paenibacillus mobilis</i>         | Bacteria | Hemp      | Grandi     | Seedling | R2A | Maceration | Bleach+EtOH |
| OKM146 | <i>Paenibacillus pabuli</i>          | Bacteria | Hemp      | Altair     | Seedling | TSA | Maceration | Bleach+EtOH |
| OKM147 | <i>Paenibacillus polymyxa</i>        | Bacteria | Hemp      | Altair     | Seedling | TSA | Maceration | Bleach+EtOH |
| OKM148 | <i>Paenibacillus mobilis</i>         | Bacteria | Hemp      | Altair     | Seedling | TSA | Maceration | Bleach+EtOH |
| OKM149 | <i>Bacillus megaterium</i>           | Bacteria | Hemp      | Altair     | Seedling | TSA | Maceration | Bleach+EtOH |
| OKM150 | <i>Paenibacillus vulneris</i>        | Bacteria | Hemp      | Altair     | Seedling | TSA | Maceration | Bleach+EtOH |
| OKM151 | <i>Paenibacillus illinoisensis</i>   | Bacteria | Hemp      | Katani     | Seedling | TSA | Maceration | Bleach+EtOH |
| OKM153 | <i>Paenibacillus yunnanensis</i>     | Bacteria | Hemp      | Katani     | Seedling | TSA | Maceration | Bleach+EtOH |
| OKM154 | <i>Paenibacillus mobilis</i>         | Bacteria | Hemp      | Katani     | Seedling | TSA | Maceration | Bleach+EtOH |
| OKM155 | <i>Paenibacillus polymyxa</i>        | Bacteria | Hemp      | Katani     | Seedling | TSA | Maceration | Bleach+EtOH |
| OKM156 | <i>Paenibacillus illinoisensis</i>   | Bacteria | Hemp      | Katani     | Seedling | TSA | Maceration | Bleach+EtOH |
| OKM157 | <i>Paenibacillus mobilis</i>         | Bacteria | Hemp      | Grandi     | Seedling | TSA | Maceration | Bleach+EtOH |
| OKM158 | <i>Paenibacillus mobilis</i>         | Bacteria | Hemp      | Altair     | Seedling | R2A | Maceration | Bleach+EtOH |
| OKM159 | <i>Paenibacillus mobilis</i>         | Bacteria | Hemp      | Grandi     | Seedling | TSA | Maceration | Bleach+EtOH |
| OKM160 | <i>Paenibacillus polymyxa</i>        | Bacteria | Hemp      | Altair     | Seedling | R2A | Maceration | Bleach+EtOH |
| OKM161 | <i>Paenibacillus mobilis</i>         | Bacteria | Hemp      | Altair     | Seedling | R2A | Maceration | Bleach+EtOH |
| OKM162 | <i>Bacillus subtilis</i>             | Bacteria | Hemp      | Grandi     | Seedling | TSA | Maceration | Bleach+EtOH |
| OKM163 | <i>Bacillus subtilis</i>             | Bacteria | Hemp      | Altair     | Seedling | R2A | Maceration | Bleach+EtOH |
| OKM165 | <i>Paenibacillus mobilis</i>         | Bacteria | Hemp      | LKCS       | Seedling | R2A | Maceration | Bleach+EtOH |
| OKM166 | <i>Paenibacillus mobilis</i>         | Bacteria | Hemp      | LKCS       | Seedling | R2A | Maceration | Bleach+EtOH |
| OKM167 | <i>Paenibacillus mobilis</i>         | Bacteria | Hemp      | LKCS       | Seedling | TSA | Maceration | Bleach+EtOH |
| OKM168 | <i>Paenibacillus mobilis</i>         | Bacteria | Hemp      | LKCS       | Seedling | TSA | Maceration | Bleach+EtOH |
| OKM169 | <i>Bacillus subtilis</i>             | Bacteria | Hemp      | LKCS       | Seedling | TSA | Maceration | Bleach+EtOH |
| OKM170 | <i>Paenibacillus polymyxa</i>        | Bacteria | Hemp      | FIN34      | Seedling | TSA | Maceration | Bleach+EtOH |
| OKM171 | <i>Paenibacillus mobilis</i>         | Bacteria | Hemp      | FIN34      | Seedling | TSA | Maceration | Bleach+EtOH |
| OKM172 | <i>Paenibacillus humicus</i>         | Bacteria | Hemp      | FIN34      | Seedling | TSA | Maceration | Bleach+EtOH |
| OKM173 | <i>Bacillus subtilis</i>             | Bacteria | Hemp      | FIN34      | Seedling | TSA | Maceration | Bleach+EtOH |
| OKM174 | <i>Bacillus megaterium</i>           | Bacteria | Hemp      | FIN34      | Seedling | R2A | Maceration | Bleach+EtOH |
| OKM175 | <i>Paenibacillus mobilis</i>         | Bacteria | Hemp      | FIN34      | Seedling | R2A | Maceration | Bleach+EtOH |
| OKM176 | <i>Paenibacillus sinopodophylli</i>  | Bacteria | Hemp      | FIN34      | Seedling | R2A | Maceration | Bleach+EtOH |
| OKM177 | <i>Paenibacillus terreus</i>         | Bacteria | Hemp      | FIN34      | Seedling | R2A | Maceration | Bleach+EtOH |
| OKM178 | <i>Bacillus zhangzhouensis</i>       | Bacteria | Hemp      | FIN34      | Seedling | R2A | Maceration | Bleach+EtOH |
| OKM180 | <i>Paenibacillus terreus</i>         | Bacteria | Hemp      | FIN34      | Seedling | R2A | Maceration | Bleach+EtOH |
| OKM181 | <i>Paenibacillus terreus</i>         | Bacteria | Hemp      | FIN34      | Seedling | R2A | Maceration | Bleach+EtOH |
| OKM182 | <i>Bacillus subtilis</i>             | Bacteria | Hemp      | FIN34      | Seedling | R2A | Maceration | Bleach+EtOH |
| OKM183 | <i>Paenibacillus pabuli</i>          | Bacteria | Hemp      | FIN34      | Seedling | R2A | Maceration | Bleach+EtOH |
| OKM184 | <i>Paenibacillus mobilis</i>         | Bacteria | Hemp      | Alyssa     | Seedling | TSA | Maceration | Bleach+EtOH |

|        |                                      |          |           |             |          |     |                  |             |
|--------|--------------------------------------|----------|-----------|-------------|----------|-----|------------------|-------------|
| OKM185 | <i>Paenibacillus vulneris</i>        | Bacteria | Hemp      | Alyssa      | Seedling | TSA | Maceration       | Bleach+EtOH |
| OKM186 | <i>Bacillus subtilis</i>             | Bacteria | Hemp      | Alyssa      | Seedling | TSA | Maceration       | Bleach+EtOH |
| OKM187 | <i>Paenibacillus mobilis</i>         | Bacteria | Hemp      | Alyssa      | Seedling | TSA | Maceration       | Bleach+EtOH |
| OKM188 | <i>Paenibacillus senegalensis</i>    | Bacteria | Hemp      | Alyssa      | Seedling | TSA | Maceration       | Bleach+EtOH |
| OKM189 | <i>Bacillus zhangzhouensis</i>       | Bacteria | Hemp      | Alyssa      | Seedling | TSA | Maceration       | Bleach+EtOH |
| OKM190 | <i>Paenibacillus mobilis</i>         | Bacteria | Hemp      | Alyssa      | Seedling | TSA | Maceration       | Bleach+EtOH |
| OKM191 | <i>Paenibacillus azotifigens</i>     | Bacteria | Hemp      | Alyssa      | Seedling | TSA | Maceration       | Bleach+EtOH |
| OKM192 | <i>Bacillus/Peribacillus simplex</i> | Bacteria | Hemp      | Alyssa      | Seedling | R2A | Maceration       | Bleach+EtOH |
| OKM193 | <i>Bacillus zhangzhouensis</i>       | Bacteria | Hemp      | Alyssa      | Seedling | R2A | Maceration       | Bleach+EtOH |
| OKM194 | <i>Bacillus/Peribacillus simplex</i> | Bacteria | Hemp      | Alyssa      | Seedling | R2A | Maceration       | Bleach+EtOH |
| OKM195 | <i>Paenibacillus taohuashanense</i>  | Bacteria | Hemp      | Alyssa      | Seedling | R2A | Maceration       | Bleach+EtOH |
| OKM196 | <i>Bacillus subtilis</i>             | Bacteria | Hemp      | FIN34       | Seedling | TSA | Maceration       | Bleach+EtOH |
| OKM197 | <i>Bacillus/Peribacillus simplex</i> | Bacteria | Hemp      | FIN34       | Seedling | TSA | Maceration       | Bleach+EtOH |
| OKM198 | <i>Psychrobacter pulmonis</i>        | Bacteria | Marijuana | God's Bud   | Seedling | TSA | Maceration       | Bleach+EtOH |
| OKM199 | <i>Bacillus megaterium</i>           | Bacteria | Hemp      | X59 Gen2    | Seedling | R2A | Maceration       | Bleach+EtOH |
| OKM200 | <i>Paenibacillus taohuashanense</i>  | Bacteria | Hemp      | X59 Gen2    | Seedling | R2A | Maceration       | Bleach+EtOH |
| OKM201 | <i>Bacillus wiedmannii</i>           | Bacteria | Hemp      | X59 Gen2    | Seedling | R2A | Maceration       | Bleach+EtOH |
| OKM202 | <i>Paenibacillus mobilis</i>         | Bacteria | Hemp      | X59 Gen2    | Seedling | R2A | Maceration       | Bleach+EtOH |
| OKM203 | <i>Paenibacillus pabuli</i>          | Bacteria | Hemp      | X59 Gen2    | Seedling | R2A | Maceration       | Bleach+EtOH |
| OKM204 | <i>Bacillus ginsengihumi</i>         | Bacteria | Hemp      | X59 Gen2    | Seedling | R2A | Maceration       | Bleach+EtOH |
| OKM205 | <i>Paenibacillus mobilis</i>         | Bacteria | Hemp      | X59 Gen2    | Seedling | R2A | Maceration       | Bleach+EtOH |
| OKM339 | <i>Bacillus megaterium</i>           | Bacteria | Flax      | Bethune-muc | Seedling | TSA | Maceration       | Bleach+EtOH |
| OKM340 | <i>Bacillus megaterium</i>           | Bacteria | Flax      | Bethune-muc | Seedling | R2A | Maceration       | Bleach+EtOH |
| PM17   | <i>Penicillium brevicompactum</i>    | Fungi    | Marijuana | God's Bud   | Seedling | PDA | Maceration       | Bleach+EtOH |
| PM35   | <i>Alternaria destruens</i>          | Fungi    | Hemp      | Altair      | Seedling | PDA | Seed germination |             |
| PM36   | <i>Penicillium robsamsonii</i>       | Fungi    | Hemp      | Altair      | Seedling | PDA | Seed germination |             |
| PM37   | <i>Penicillium aurantiogriseum</i>   | Fungi    | Hemp      | Altair      | Seedling | PDA | Seed germination |             |
| PM38   | <i>Cladosporium crousii</i>          | Fungi    | Marijuana | BC Big Bud  | Seedling | PDA | Seed germination |             |
| PM39   | <i>Apiospora marii</i>               | Fungi    | Marijuana | BC Big Bud  | Seedling | PDA | Seed germination |             |
| PM40   | <i>Aspergillus fumigatus</i>         | Fungi    | Hemp      | CAN3797     | Seedling | PDA | Seed germination |             |
| PM41   | <i>Aspergillus fumigatus</i>         | Fungi    | Hemp      | CAN3797     | Seedling | PDA | Seed germination |             |
| PM42   | <i>Cladosporium crousii</i>          | Fungi    | Hemp      | CAN3797     | Seedling | PDA | Seed germination |             |
| PM43   | <i>Chaetomium ovatoascomatis</i>     | Fungi    | Hemp      | Fin34       | Seedling | PDA | Seed germination |             |
| PM45   | <i>Aspergillus cibarius</i>          | Fungi    | Hemp      | Fin34       | Seedling | PDA | Seed germination |             |
| PM46   | <i>Alternaria destruens</i>          | Fungi    | Hemp      | Grandi      | Seedling | PDA | Seed germination |             |
| PM47   | <i>Alternaria destruens</i>          | Fungi    | Hemp      | Grandi      | Seedling | PDA | Seed germination |             |
| PM48   | <i>Alternaria destruens</i>          | Fungi    | Hemp      | Grandi      | Seedling | PDA | Seed germination |             |
| PM49   | <i>Rhizopus arrhizus</i>             | Fungi    | Hemp      | Katani      | Seedling | PDA | Seed germination |             |
| PM50   | <i>Penicillium citrinum</i>          | Fungi    | Hemp      | LKCS        | Seedling | PDA | Seed germination |             |
| PM51   | <i>Aspergillus tubingensis</i>       | Fungi    | Marijuana | God's Bud   | Seedling | PDA | Seed germination |             |
| PM52   | <i>Penicillium lanosocoeruleum</i>   | Fungi    | Marijuana | God's Bud   | Seedling | PDA | Seed germination |             |
| PM53   | <i>Aureobasidium pullulans</i>       | Fungi    | Hemp      | X-59        | Seedling | PDA | Seed germination |             |
| PM54   | <i>Hormonema macrosporum</i>         | Fungi    | Hemp      | X-59        | Seedling | PDA | Seed germination |             |
| PM55   | <i>Hormonema macrosporum</i>         | Fungi    | Hemp      | X-59        | Seedling | PDA | Seed germination |             |
| PM56   | <i>Condenascus tortuosus</i>         | Fungi    | Hemp      | X59 Gen2    | Seedling | PDA | Seed germination |             |
| PM60   | <i>Fusarium fujikuroi</i>            | Fungi    | hemp      | VIR 577     | Seedling | PDA | Seed germination |             |
| PM61   | <i>Penicillium citrinum</i>          | Fungi    | hemp      | VIR 577     | Seedling | PDA | Seed germination |             |
| PM62   | <i>Aspergillus tubingensis</i>       | Fungi    | hemp      | VIR 577     | Seedling | PDA | Seed germination |             |
| PM63   | <i>Aspergillus ochraceus</i>         | Fungi    | hemp      | VIR 577     | Seedling | PDA | Seed germination |             |

**Figure S1.** 16S Phylogenetic Tree of Culturable Seed-borne Cannabis Seedling Endophytes Across Hemp X59 Generations.

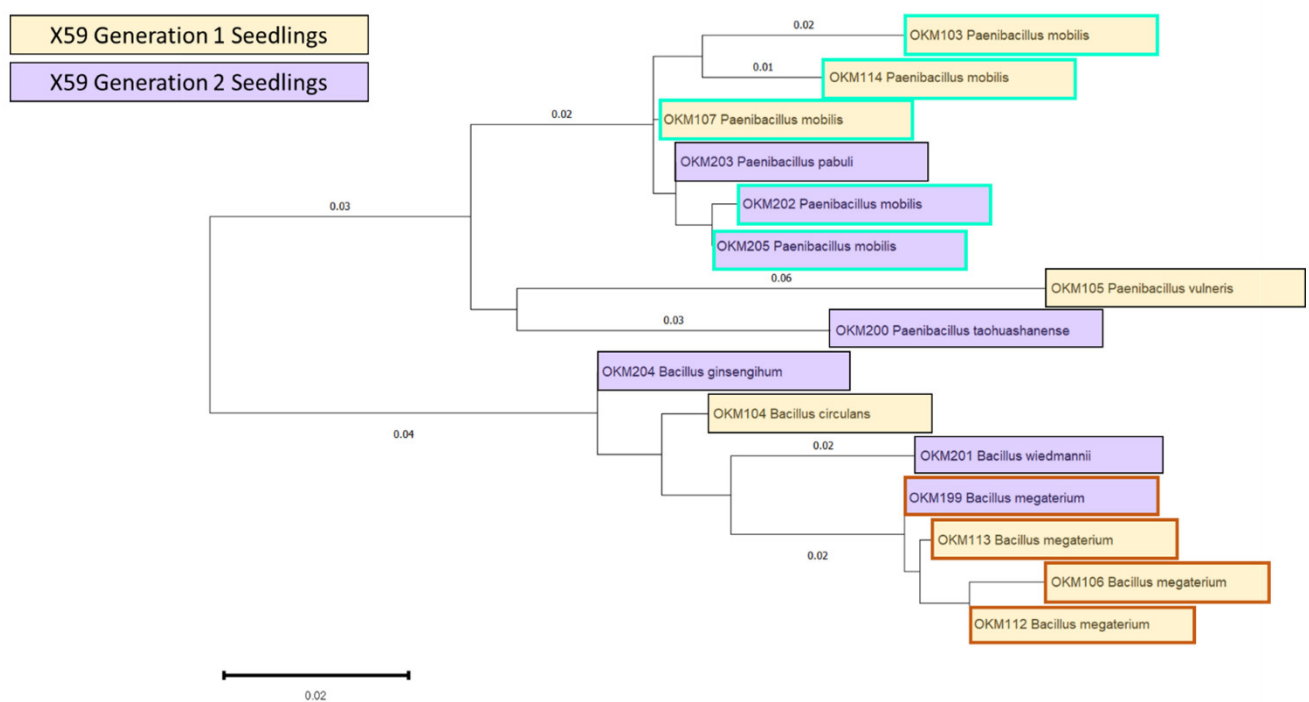

Strains of *Bacillus megaterium* and *Paenibacillus mobilis* were cultured from two successive generations of Hemp X59 grown to seed. Generation-1 was grown outdoors in soil in Vegreville, AB, Generation-2 was grown indoors in Sunshine Mix in Kelowna, BC. *P. mobilis* isolates are outlined in teal. *B. megaterium* isolates are outlined in orange. Amplicons were aligned using MUSCLE algorithm prior to nearest-neighbor phylogenetic tree was construction using Tamura-Nei model on MEGA software (Version 11.0.11).

**Figure S2.** Altair Seed-Associated Fungi.

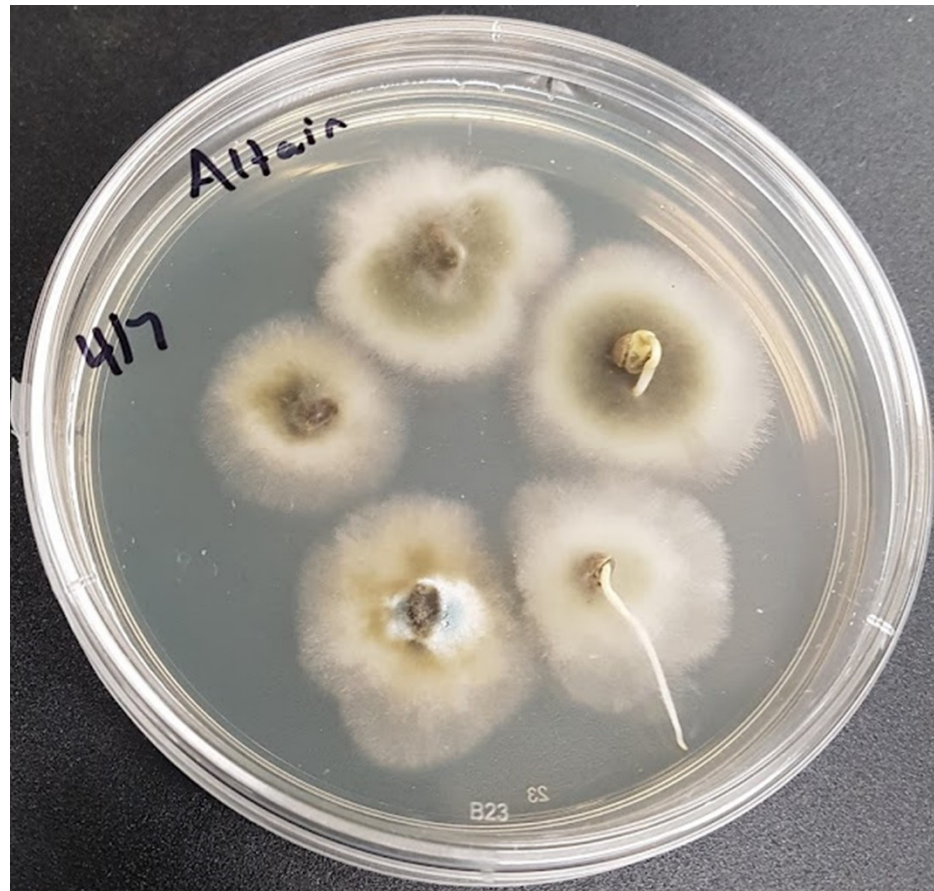

*Alternaria* and *Penicillium* growth on germinating Altair hemp seeds 4 days after planting on PDA.
